# Supplementary material for: One-step synthesis and applications of highly concentrated silver nanoparticles with an ultra-thin silica shell
Source: Royal Society of Chemistry journal article supplement (doi:10.1039/c6ra20669g), 2016-01-01
Supplement: c6ra20669g1.pdf [file c6ra20669g1.pdf]

## Supplementary Material

# One-Step Synthesis and Applications of Highly Concentrated Silver Nanoparticles with an Ultra-Thin Silica Shell

Daniel R. Willett and George Chumanov\*

Department of Chemistry, Clemson University, Clemson, South Carolina 29634

\* - Author to whom correspondence should be addressed

Email: [gchumak@clemson.edu](mailto:gchumak@clemson.edu)

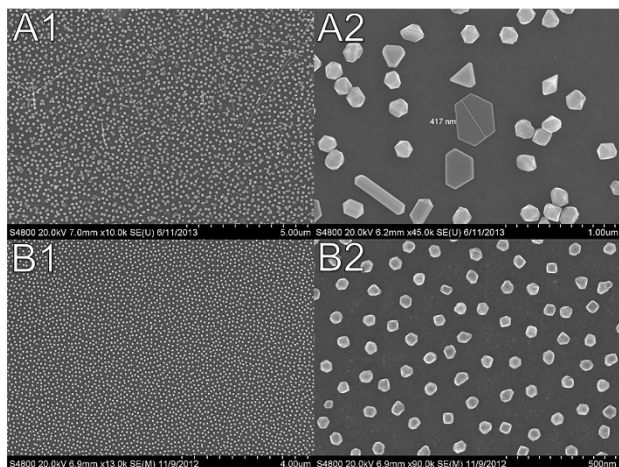

**Figure S1.** SEM images of AgNPs grown to 100 nm in Pyrex (A) and AgNPs grown to 100 nm in quartz with the addition of 1 mM fumed silica (B)

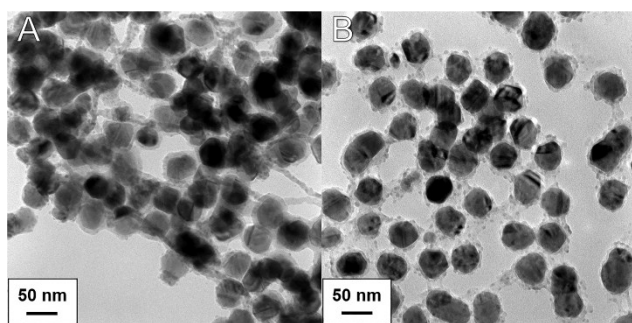

**Figure S2.** TEM images of AgNPs grown to ~50 nm AgNP with 0.8 mM (A) and 6 mM (B) of sodium silicate added. (A) with an O.D. of 2.7 was obtained after 30 minutes while (B) an O.D. of 84 required 5 hours.

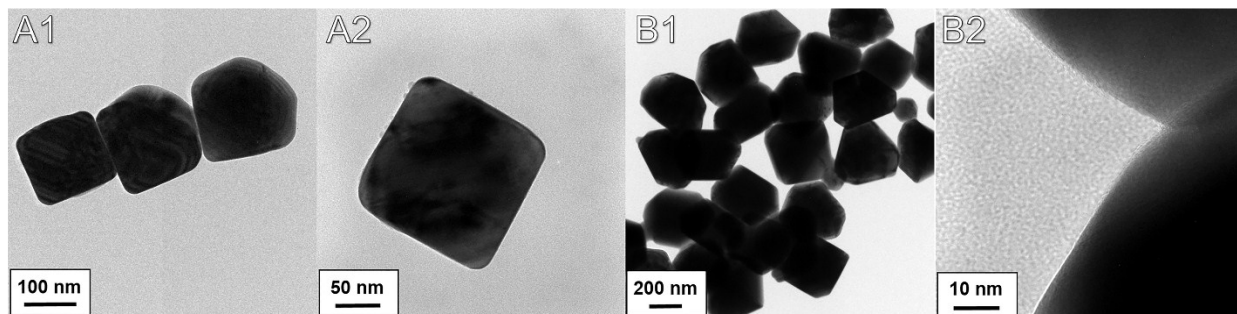

**Figure S3.** HR-TEM images of AgNPs grown to ~250 nm (A) and ~400 nm (B) with 1.27 & 0.5 mM fumed silica, respectively.
